# Supplementary material for: Characteristics of toxicity occurrence patterns in concurrent chemoradiotherapy after induction chemotherapy for patients with locally advanced non-small cell lung cancer: a pooled analysis based on individual patient data of CALGB/Alliance trials
Source: PubMed Central journal article supplement — Transl Cancer Res. 2022 Oct;11(10):3506–21. doi: 10.21037/tcr-22-2006 (PMC9641080; doi:10.21037/tcr-22-2006), 2022-10
Supplement: tcr-11-10-3506-dss.pdf [file tcr-11-10-3506-dss.pdf]

## Data Sharing Statement

|                     |                                                                                                                                                    |                                                                                                             |
|---------------------|----------------------------------------------------------------------------------------------------------------------------------------------------|-------------------------------------------------------------------------------------------------------------|
| <b>Article Info</b> | <a href="http://dx.doi.org/10.21037/tcr-22-2006">http://dx.doi.org/10.21037/tcr-22-2006</a>                                                        |                                                                                                             |
| <b>Item</b>         | <b>Question</b>                                                                                                                                    | <b>Authors' Response<br/>(place "-" if not applicable)</b>                                                  |
| 1                   | Would you like to share data collected for your study to others?                                                                                   | No                                                                                                          |
| 2                   | If not, would you like to share the reason for your decision?                                                                                      | The data we used are from clinical trials and should be secured in the data repository previously approved. |
| 3                   | What data in particular will be shared?                                                                                                            | -                                                                                                           |
| 4                   | Any other documents will be share? Such as study protocol, statistical analysis plan, informed consent form, clinical study report, analytic code. | -                                                                                                           |
| 5                   | When will data availability begin?                                                                                                                 | -                                                                                                           |
| 6                   | When will data availability end?                                                                                                                   | -                                                                                                           |
| 7                   | To whom will you share the data?                                                                                                                   | -                                                                                                           |
| 8                   | For what type of analysis or purpose?                                                                                                              | -                                                                                                           |
| 9                   | How or where can the data/documents be obtained?                                                                                                   | -                                                                                                           |
| 10                  | Any other restrictions?                                                                                                                            | -                                                                                                           |
